# Supplementary figures and images for: Biallelic variants in VARS in a family with two siblings with intellectual disability and microcephaly: case report and review of the literature
Source: PubMed Central journal article supplement — Cold Spring Harb Mol Case Stud. 2018 Oct;4(5):a003301. doi: 10.1101/mcs.a003301 (PMC6169829; doi:10.1101/mcs.a003301), 2018-10

**I**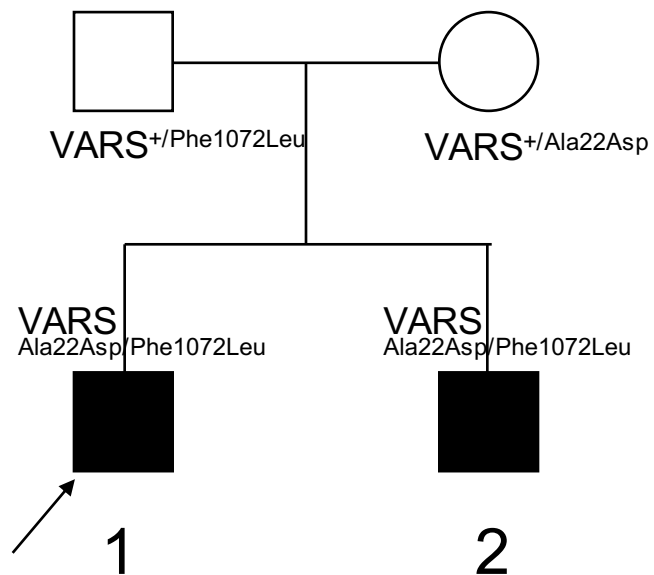**II**

NM\_006295:c.3214C>T

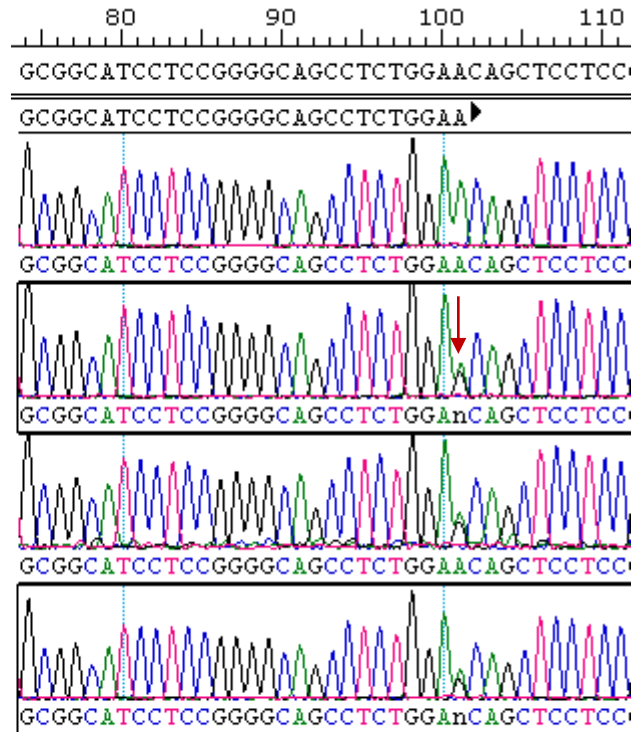

NM\_006295:c.65C>A

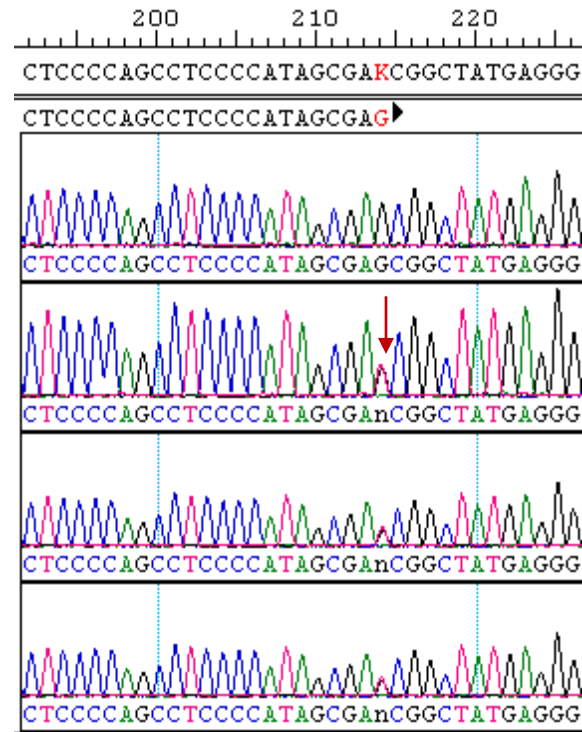

Supplement: supp_mcs.a003301_Supplemental_Figure_1.pdf [file supp_mcs.a003301_Supplemental_Figure_1.pdf]
